# Supplementary material for: Association of childhood obesity with risk of early all-cause and cause-specific mortality: A Swedish prospective cohort study
Source: PubMed Central journal article supplement (PMC7080224; doi:10.1371/journal.pmed.1003078), 2020-03-18
Supplement: pmed.1003078.s002.pdf [file pmed.1003078.s002.pdf]

S1 Table. Characteristics of the participants ( $n = 41,359$ ) stratified by sex.

| Characteristic                                | Girls                    |                  |                 | Boys                     |                  |                 |
|-----------------------------------------------|--------------------------|------------------|-----------------|--------------------------|------------------|-----------------|
|                                               | Childhood obesity cohort | Comparison group | <i>p</i> -Value | Childhood obesity cohort | Comparison group | <i>p</i> -Value |
| Individuals                                   | 3,231 (100.0)            | 15,734 (100.0)   |                 | 3,818 (100.0)            | 18,576 (100.0)   |                 |
| Deaths                                        | 16 (0.50)                | 21 (0.13)        | <.001           | 23 (0.60)                | 44 (0.24)        | <0.001          |
| Person-years of follow-up                     | 15,684                   | 76,418           |                 | 16,817                   | 81,833           |                 |
| Nordic origin                                 | 2,362 (73.1)             | 11,539 (73.3)    | 0.78            | 2,757 (72.2)             | 13,788 (74.2)    | 0.0099          |
| Emigrated at $\geq 18$ years of age           | 46 (1.4)                 | 327 (2.1)        | 0.015           | 34 (0.9)                 | 267 (1.4)        | 0.0075          |
| Genetic syndrome <sup>a</sup>                 | 27 (0.84)                | 36 (0.23)        | <.001           | 38 (1.00)                | 54 (0.29)        | <.001           |
| Malignant tumor <18 years of age <sup>b</sup> | 34 (1.01)                | 42 (0.27)        | <.001           | 26 (0.68)                | 65 (0.35)        | 0.0031          |
| Parental SES                                  |                          |                  | <.001           |                          |                  | <.001           |
| Low                                           | 771 (23.9)               | 2,456 (15.6)     |                 | 839 (22.0)               | 2,801 (15.1)     |                 |
| Medium-low                                    | 1,228 (38.0)             | 4,977 (31.6)     |                 | 1,444 (37.8)             | 5,886 (31.7)     |                 |
| Medium-high                                   | 927 (28.7)               | 5,434 (34.5)     |                 | 1,139 (29.8)             | 6,342 (34.1)     |                 |
| High                                          | 288 (8.9)                | 2,746 (17.5)     |                 | 385 (10.1)               | 3,360 (18.1)     |                 |
| Missing                                       | 17 (0.5)                 | 121 (0.8)        |                 | 11 (0.3)                 | 187 (1.0)        |                 |

Data are  $n$  (%) unless otherwise indicated.

<sup>a</sup> Fragile X, Klinefelter, Laurence-Moon-Bardet-Biedl, Down, Noonan, Prader-Willi, Silver Russell, and Turner

<sup>b</sup> Including brain tumors (malignant and benign).

SES, socioeconomic status.
