# Supplementary material for: Association of childhood obesity with risk of early all-cause and cause-specific mortality: A Swedish prospective cohort study
Source: PubMed Central journal article supplement (PMC7080224; doi:10.1371/journal.pmed.1003078), 2020-03-18
Supplement: pmed.1003078.s003.pdf [file pmed.1003078.s003.pdf]

S2 Table. Primary cause-specific mortality.

| Cause of death                                       | Childhood obesity cohort |            | Comparison group |            |
|------------------------------------------------------|--------------------------|------------|------------------|------------|
|                                                      | n                        | %          | n                | %          |
| <b>Endogenous causes</b>                             |                          |            |                  |            |
| Cancer                                               | 4                        | 10.3       | 7                | 10.8       |
| Infections                                           | 4                        | 10.3       | 3                | 4.6        |
| Endocrine causes                                     | 3                        | 7.7        | 2                | 3.1        |
| Other <sup>a</sup>                                   | 4                        | 10.3       | 5                | 7.7        |
| <b>Injuries and external causes</b>                  |                          |            |                  |            |
| Transportation accident                              | 4                        | 10.3       | 6                | 9.2        |
| Homicide                                             | 2                        | 5.1        | 5                | 7.7        |
| Other <sup>b</sup>                                   | 1                        | 2.5        | 3                | 4.6        |
| <b>Suicide and self-harm</b>                         |                          |            |                  |            |
| Suicide                                              | 3                        | 7.7        | 19               | 29.2       |
| Self-harm with unintentional- or undetermined intent | 13                       | 33.3       | 12               | 18.5       |
| <b>Unknown cause<sup>c</sup></b>                     | 1                        | 2.5        | 3                | 4.6        |
| <b>Total deceased</b>                                | <b>39</b>                | <b>100</b> | <b>65</b>        | <b>100</b> |

<sup>a</sup> Including e.g. pulmonary embolism and congenital risk factors.

<sup>b</sup> Including e.g. war action and drowning.

<sup>c</sup> Including e.g. death abroad and declining rates of autopsy.
